# Supplementary material for: Characterisation of Bee Pollen from the Marche Region (Italy) According to the Botanical and Geographical Origin with Analysis of Antioxidant Activity and Colour, Using a Chemometric Approach
Source: MDPI journal article supplement (doi:10.3390/molecules27227996), 2022-11-18
Supplement: s1 [file s1]

Table 15. Complete palynological analysis of the bee pollen samples. Identification of pollen type and percentage, of harvesting zone (Isola del Piano = PU; Loc. Cavaceppo = AP; Matelica = MC) and period for each pollen sample are provided. The botanical species was determined also using the knowledge on territory's flora, the cultivation maps, and beekeepers' indications.

[illegible]
